# Supplementary material
Source: publisher figshare collection journal article supplement (https://sage.figshare.com/ndownloader/files/22692545)
Supplement: Supplementary file 1 [file 22692545]

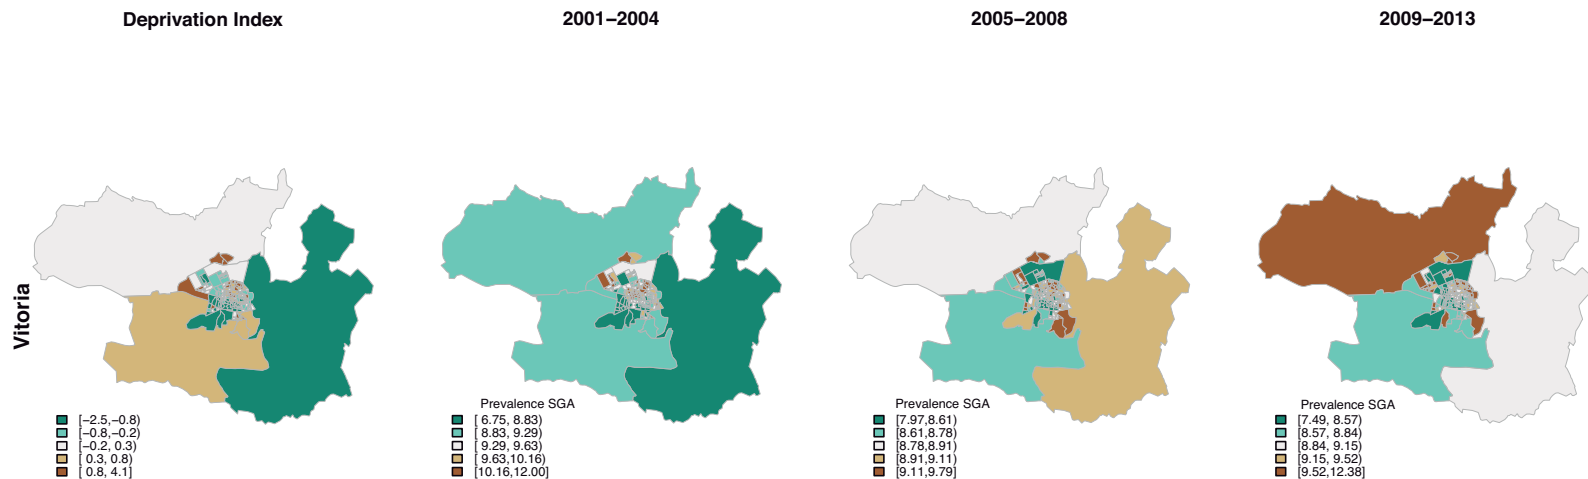

**Figure S6. Distribution of the deprivation index and the prevalence of small for gestational age births (SGA) in three periods. Spanish mothers from Vitoria. Green areas represent low prevalence and low socioeconomic deprivation; brown areas represent high prevalence and high socioeconomic deprivation.**
